# Supplementary material for: Efficient long lifetime room temperature phosphorescence of carbon dots in a potash alum matrix
Source: Royal Society of Chemistry journal article supplement (doi:10.1039/c5tc00126a), 2015-01-01
Supplement: c5tc00126a2.pdf [file c5tc00126a2.pdf]

## **Supplementary Information**

# **Efficient long lifetime Room Temperature Phosphorescence of carbon dots in potash alum matrix**

**Xinwei Dong, Liangming Wei, Yanjie Su, Zhongli Li, Huijuan Geng, Chao Yang and  
Yafei Zhang\***

## **Experimental section**

### ***Chemicals:***

Potash alum, ethanolamine and hydrogen peroxide aqueous solution (30%hydrogen peroxide) were of analytical-reagent grade and purchased from Sinopharm Chemical Reagent Co., Ltd (Shanghai, China). Deionized water with a resistivity of 18.1 MΩ cm was used for all experiments.

### ***Preparation of carbon dots:***

In the synthesized experiment of Carbon dots, the ethanolamine (3 ml) in a beaker (200 ml) was pyrolyzed in the stove at 150 °C under air environment for 2 hours. The color of liquid changed from colorless to bright yellow liquid after 1 hour, and then dark at last, implying the formation of N-CD1.

### ***Instrumentation***

The morphologies of the samples were observed by JEM-2100 microscope (Japan, JEOL) with an accelerating voltage of 200 kV. X-ray

diffraction (XRD) analysis was carried out using a D8 Advance, Bruker AXS Corporation, Germany. FTIR spectra were recorded on a Bruker (Germany) VERTEC 80v vacuum FTIR spectrometer. The UV-Vis absorption spectra were recorded on a Perkin-Elmer Lambda 950 UV-Vis-NIR spectrophotometer. The photoluminescent (PL) spectra were recorded using a fluorescent spectrophotometer (F-4600, Hitachi, Japan). Phosphorescence measurements were performed on a Hitachi F-4600 spectrofluorometer (Hitachi Co. Ltd., Japan) in the phosphorescence mode. Time-resolved fluorescence and phosphorescence decay by delay was measured using a steady-state & time-resolved fluorescence spectrofluorometer (QM/TM/IM, PTI, USA).

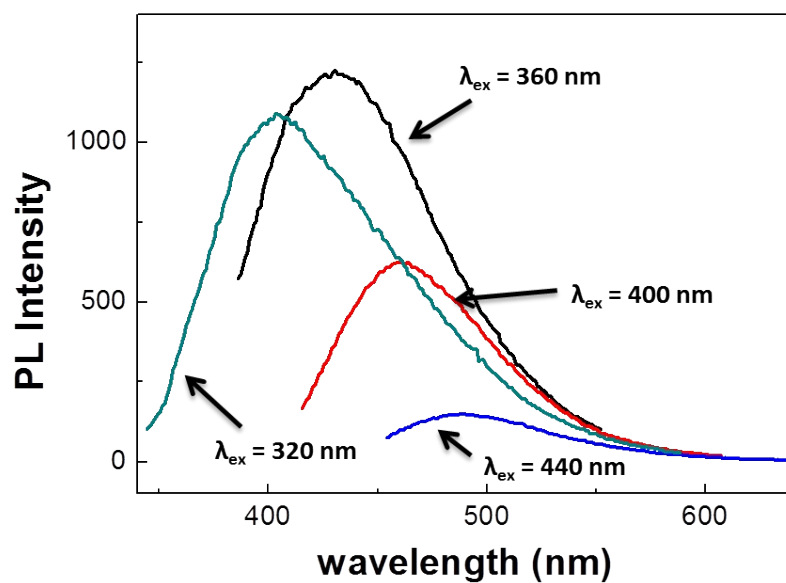

**Fig. S1** Emission spectra for the carbon dots dispersed in water at  
excitation

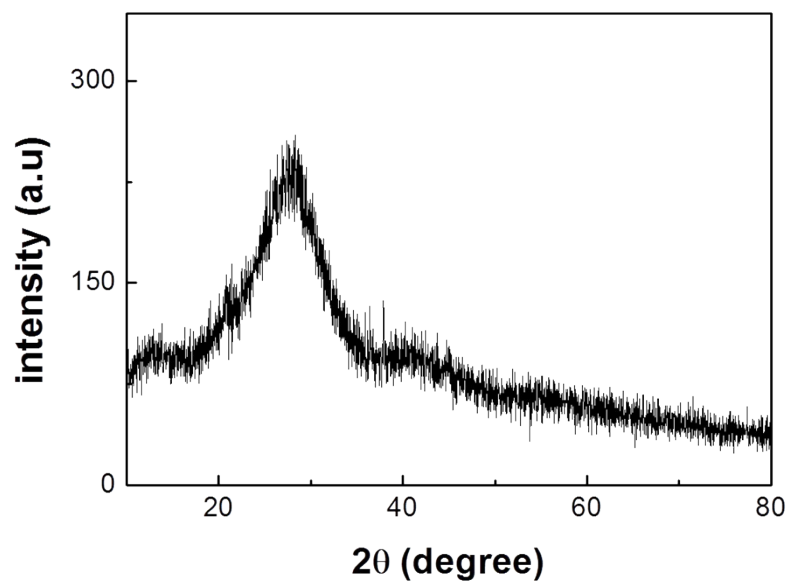

**Fig. S2** X-ray diffraction patterns of the CDs-APS1 composite powders.

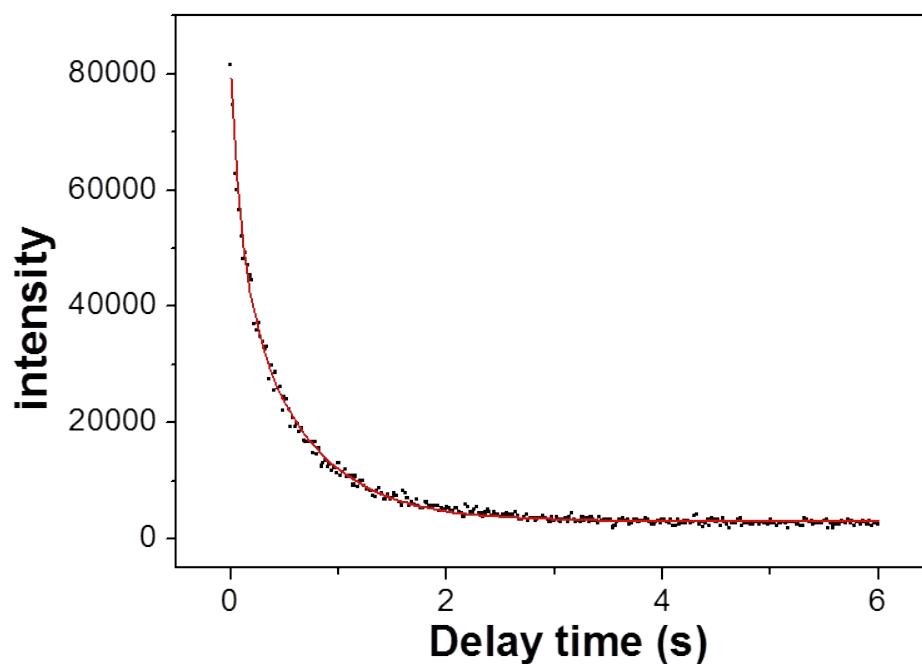

**Fig. S3** Time resolved phosphorescence decay( $\lambda_{\text{ex}} = 360 \text{ nm}$ ,  $\lambda_{\text{em}} = 500 \text{ nm}$ ) of the CDs-APS3 powders

The CDs- $\text{KAl}(\text{SO}_4)_2 \cdot x(\text{H}_2\text{O})$  composite powders dried in an oven under  $60^\circ\text{C}$  (CDs-APS3) for two days have been obtained. The CDs-APS3 powders own two phosphorescence lifetimes of 616 ms (57.0%) and 105ms (43.0%). The long phosphorescence lifetimes is 616 ms and average lifetimes is 558 ms which is smaller than CDs-APS1 but more than CDs-APS2.

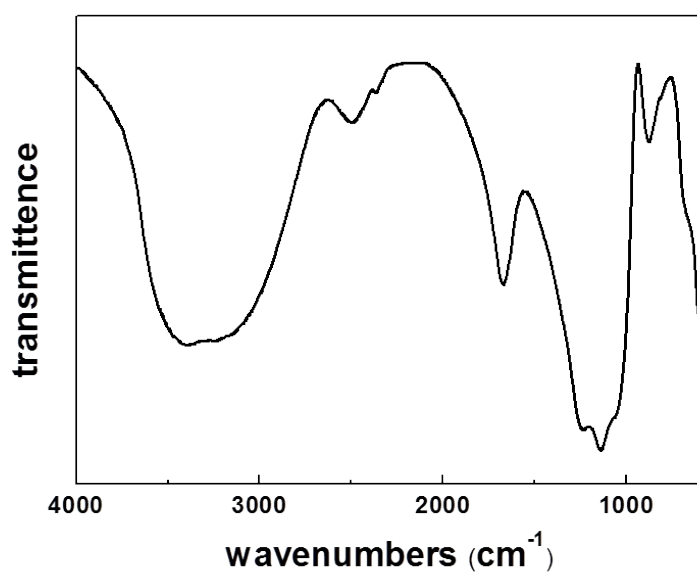

**Fig. S4** Typical FTIR spectra of the CDs-APS1 powders.

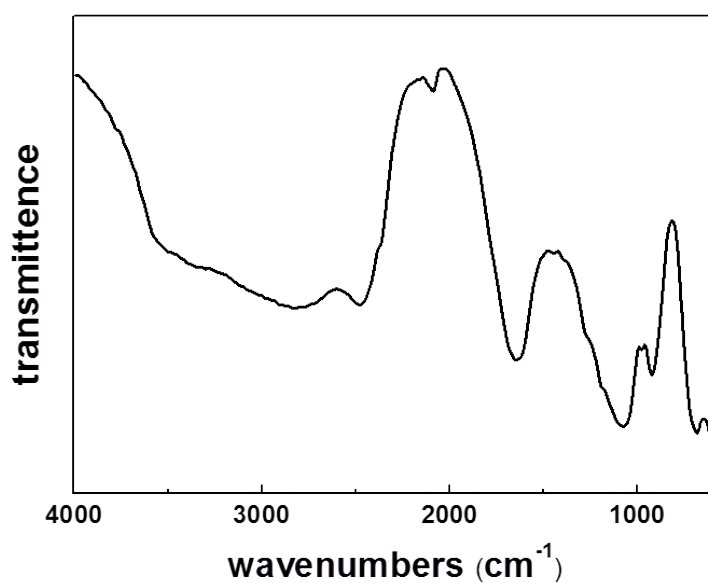

**Fig. S5** Typical FTIR spectra of the CDs-APS2 powders.

As shown in the Fig. S4 and Fig. S5, The peak around 1650  $\text{cm}^{-1}$ , assigned the C=O stretching of the amide bond of CDs-APS1 and CDs-APS2, is different obviously from the CDs. The peaks of C=O stretching are more smooth.
